# Supplementary material for: Pressure-induced valence transition in the mixed-valence (Sm1/3Ca2/3)2.75C60 fulleride
Source: Royal Society of Chemistry journal article supplement (doi:10.1039/d0qm00707b), 2020-01-01
Supplement: d0qm00707b1.pdf [file d0qm00707b1.pdf]

## Electronic Supplementary Information

### Pressure-induced valence transition in the mixed-valence

### $(\text{Sm}_{1/2}\text{Ca}_{1/2})_{2.75}\text{C}_{60}$ fulleride

Naoya Yoshikane,<sup>a</sup> Keisuke Matsui,<sup>a</sup> Takeshi Nakagawa,<sup>b</sup> Anastasia G. V. Terzidou,<sup>c</sup> Yasuhiro Takabayashi,<sup>d,e</sup> Hitoshi Yamaoka,<sup>f</sup> Nozomu Hiraoka,<sup>g</sup> Hirofumi Ishii,<sup>g</sup> John Arvanitidis<sup>c</sup> and Kosmas Prassides<sup>a,d\*</sup>

- a. Department of Materials Science, Graduate School of Engineering, Osaka Prefecture University, Osaka 599-8531, Japan. E-mail: k.prassides@mtr.osakafu-u.ac.jp; Tel: +81 72 254 6162
- b. Center for High-Pressure Science & Technology Advanced Research, 100094 Beijing, P.R. China
- c. Physics Department, Aristotle University of Thessaloniki, 54124 Thessaloniki, Greece
- d. WPI-Advanced Institute for Materials Research (WPI-AIMR), Tohoku University, Sendai 980-8577, Japan
- e. Department of Physical Science and Engineering, Nagoya Institute of Technology, Nagoya 466-8555, Japan
- f. RIKEN SPring-8 Center, Sayo, Hyogo 679-5148, Japan
- g. National Synchrotron Radiation Research Center, Hsinchu 30076, Taiwan

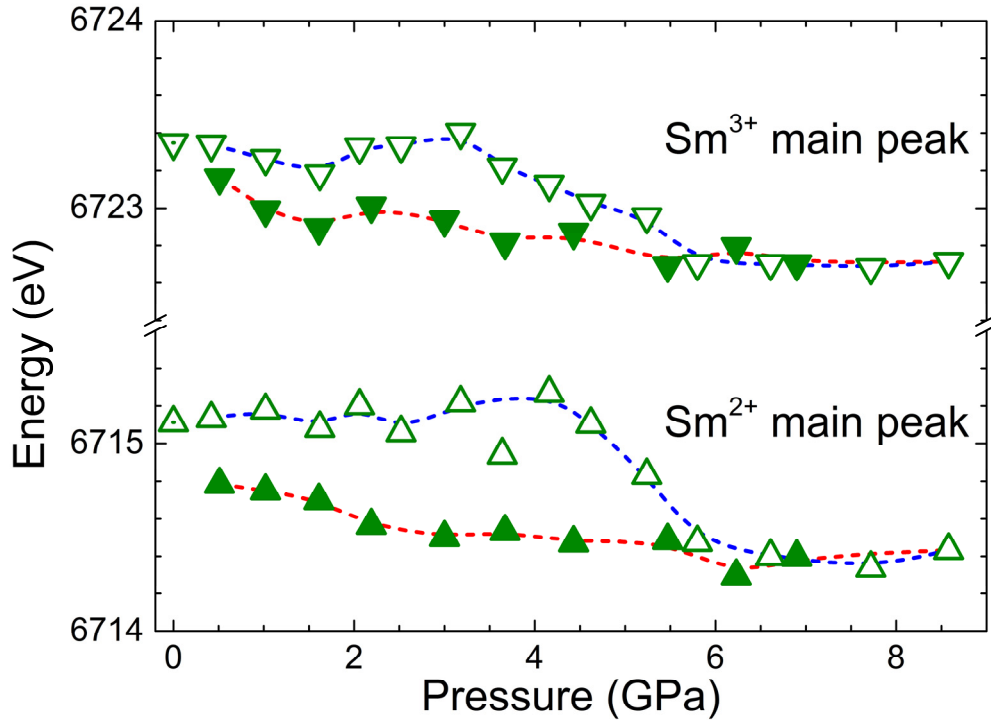

**Fig. S1** Pressure dependence of the energies of the Sm<sup>2+</sup> and Sm<sup>3+</sup> main peaks as extracted from fits to the ambient temperature experimental PFY-XAS spectra of the (Sm<sub>1/2</sub>Ca<sub>1/2</sub>)<sub>2.75</sub>C<sub>60</sub> fulleride. Open (closed) symbols label data obtained upon pressure increase (decrease). The dotted symbols are the corresponding data at ambient pressure. Dashed lines through the data are guides to the eye. The energies of the three additional satellite sub-peaks used in the fits (Fig. 3) were kept fixed at 6713.43 (Sm<sup>2+</sup>), 6717.26 (Sm<sup>2+</sup>) and 6721.38 (Sm<sup>3+</sup>) eV.

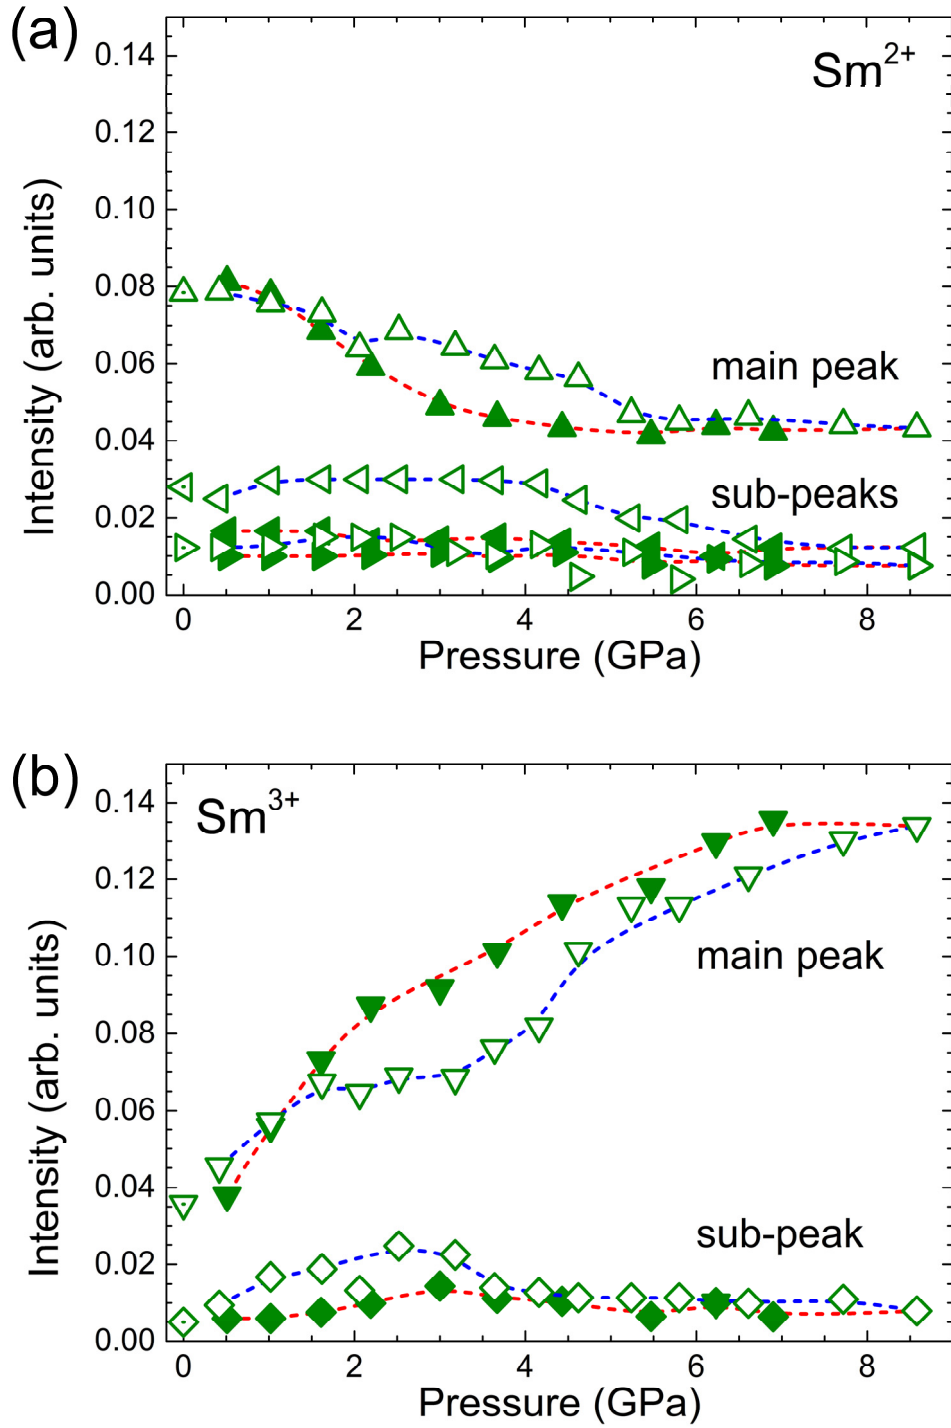

**Fig. S1** Pressure dependence of the intensities of all Sm<sup>2+</sup> and Sm<sup>3+</sup> sub-peaks as extracted from fits to the ambient temperature experimental PFY-XAS spectra of the (Sm<sub>1/3</sub>Ca<sub>2/3</sub>)<sub>2.75</sub>C<sub>60</sub> fulleride. During the fitting procedure, only the widths of the main peaks were allowed to vary. Open (closed) symbols label data obtained upon pressure increase (decrease). The dotted

symbols are the points at ambient pressure. Dashed lines through the data are guides to the eye. The intensities of the 6713.43-eV ( $\text{Sm}^{2+}$ ) subpeak are shown as left-pointing triangles, while those of the 6717.26-eV ( $\text{Sm}^{2+}$ ) subpeak as right-pointing triangles.
